# Supplementary material
Source: Springer Nature journal article supplement (https://www.springermedizin.de/resource/supplementary/12889_2010_3139_MOESM1_ESM.pdf/9488446)

● clusters of questionnaire addresses

— power lines

● GSM / UMTS antennas

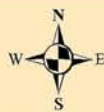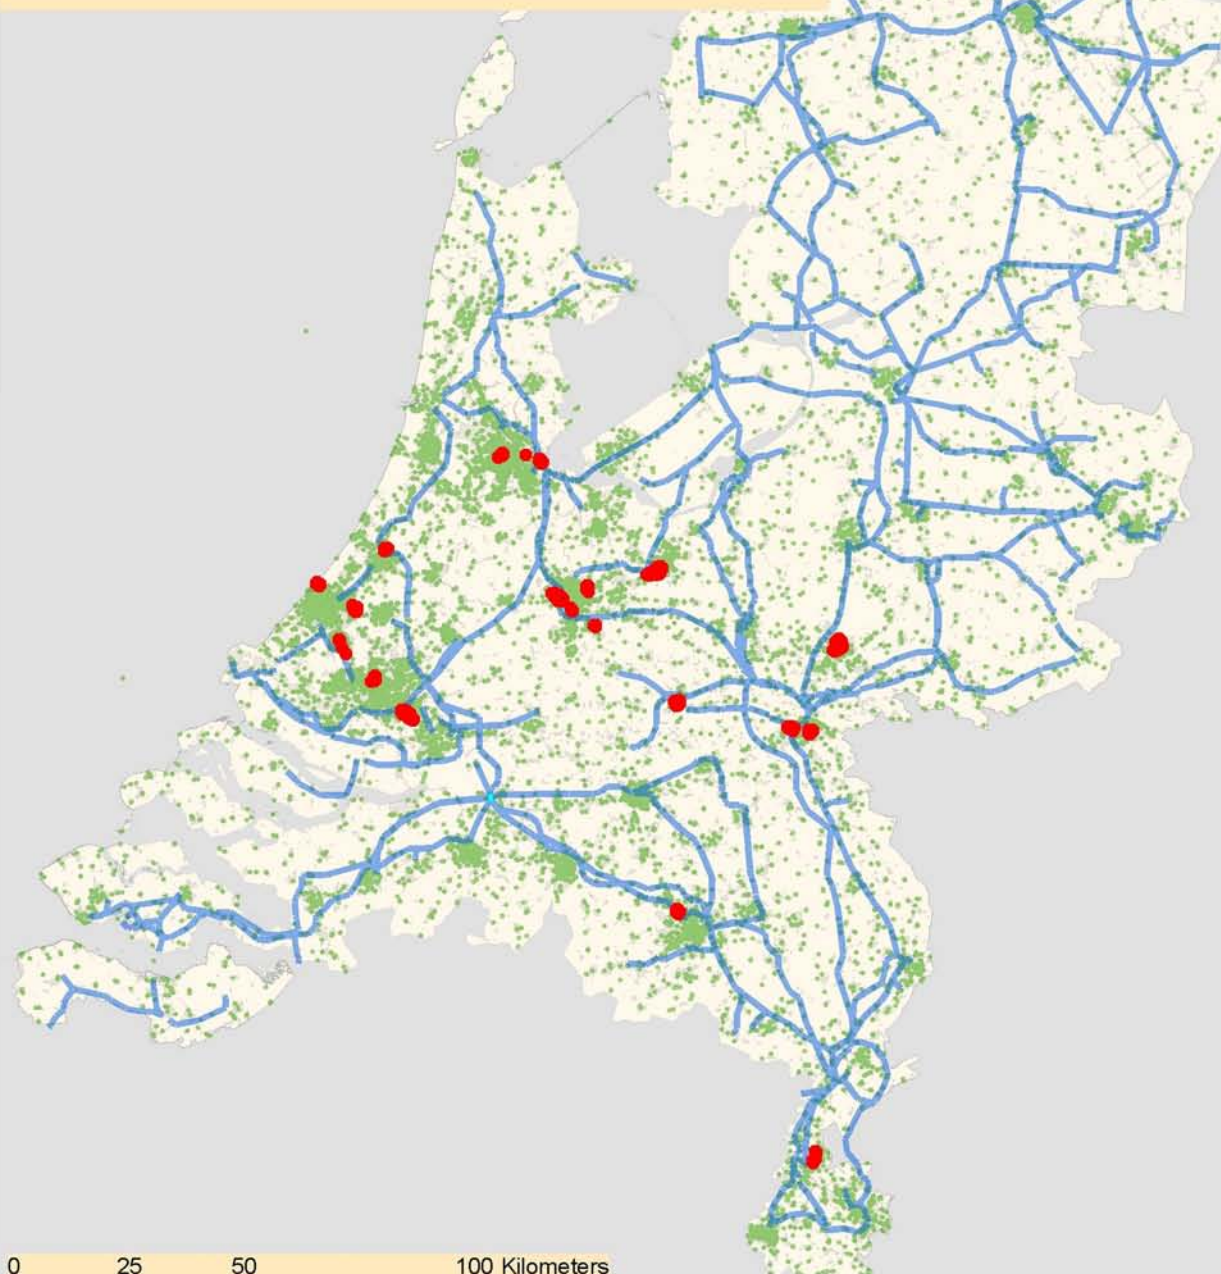

0 25 50 100 Kilometers

Supplement: MOESM1 [file 9488446]
